# Supplementary material for: Joint genotype and ancestry analysis identify novel loci associated with atopic dermatitis in African American population
Source: PubMed Central journal article supplement — HGG Adv. 2024 Sep 7;5(4):100350. doi: 10.1016/j.xhgg.2024.100350 (PMC11470243; doi:10.1016/j.xhgg.2024.100350), 2024-09-07
Supplement: mmc1.pdf [file mmc1.pdf]

**HGGA, Volume 5**

**Supplemental information**

**Joint genotype and ancestry analysis  
identify novel loci associated with atopic  
dermatitis in African American population**

**Yadu Gautam, Latha Satish, Stephen Ramirez, Brittany Grashel, Jocelyn M. Biagini, Lisa J. Martin, Marc E. Rothenberg, Gurjit K. Khurana Hershey, and Tesfaye B. Mersha**

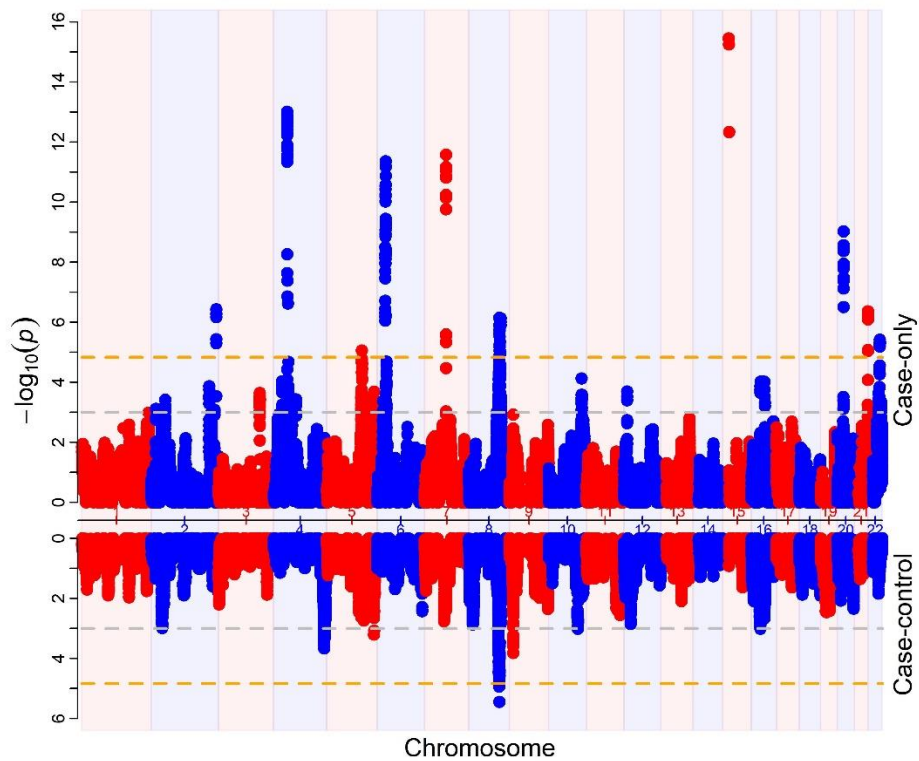

Supplemental Figure S1. Miami plot of inflation unadjusted AM results. The upper section shows results from case-only analysis and the lower section shows results from case-control analysis. Orange horizontal lines represent genome-wide significance cut-off at p-value  $< 1.47E-5$ .

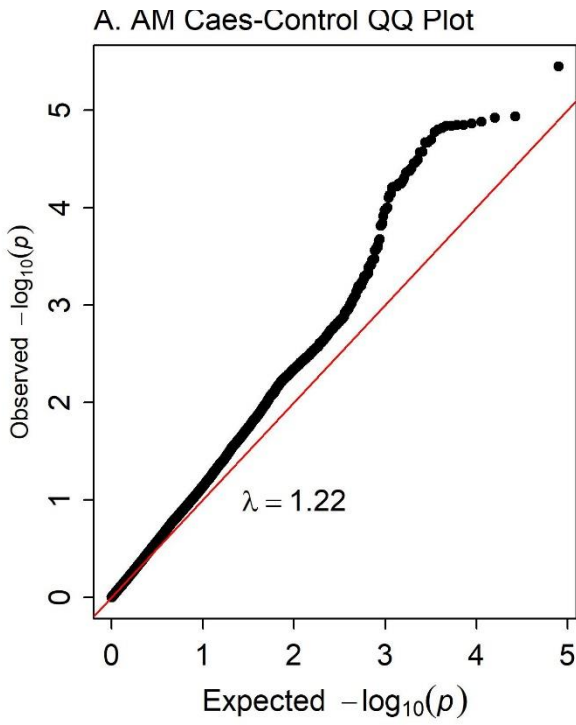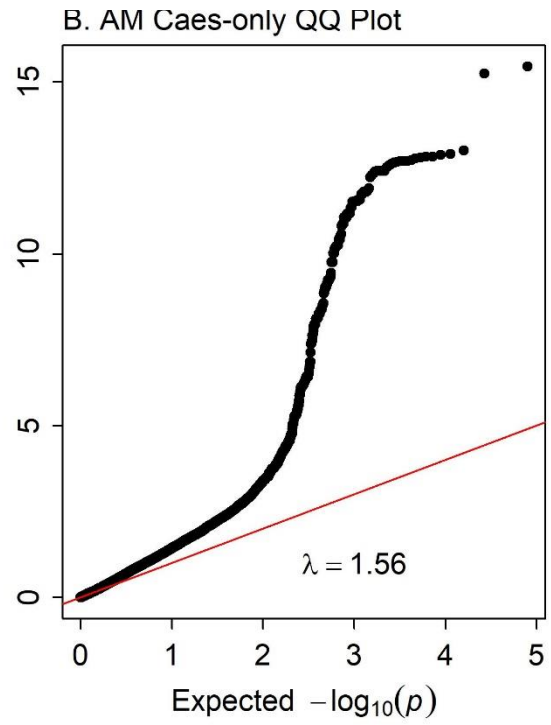

Supplemental Figure S2. QQ plots of (A) case-control and (B) case-only AM results.  $\lambda$  = genomic inflation factor

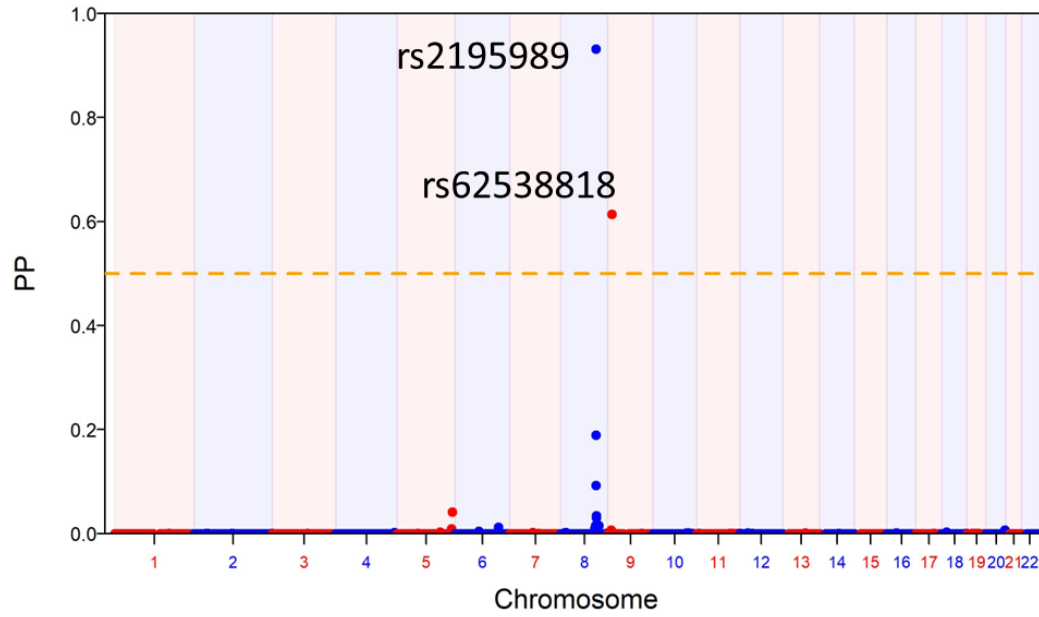

Supplemental Figure S3. BMIX result. Figure shows the posterior probability (PP) from the BMIX joint analysis. Dashed horizontal line represents the significance threshold at PP = 0.5

**Supplemental Table T1.** AD-associated genes.

| CHR | GENE    | Study      |
|-----|---------|------------|
| 4   | SLAIN2  | AM finemap |
| 6   | RNF39   | AM finemap |
| 20  | FOXA2   | AM finemap |
| 3   | PTPRG   | GWAS       |
| 5   | ADAMTS6 | GWAS       |
| 6   | SGK1    | GWAS       |
| 6   | OPRM1   | GWAS       |
| 8   | SYBU    | GWAS       |
| 8   | AARD    | GWAS       |
| 8   | EFR3A   | GWAS       |
| 9   | PTPRD   | GWAS       |
| 14  | MMP14   | GWAS       |
| 15  | CYFIP1  | GWAS       |
| 8   | ANGPT1  | BMIX       |

**Supplemental Table T2:** Characteristics of the MPAACH Participants Used in this Study.

| MPAACH Participant | AD Severity | Sex    | Race      |
|--------------------|-------------|--------|-----------|
| Healthy Control 1  | Non – AD    | Male   | Non-Black |
| Healthy Control 2  | Non-AD      | Female | Black     |
| Healthy Control 3  | Non-AD      | Male   | Black     |
| AD Patient 1       | Moderate    | Female | Black     |
| AD Patient 2       | Moderate    | Female | Non-Black |
| AD Patient 3       | Moderate    | Female | Black     |
| AD Patient 4       | Moderate    | Male   | Black     |
| AD Patient 5       | Moderate    | Male   | Non-Black |
| AD Patient 6       | Moderate    | Male   | Non-Black |

**Supplemental Table T3:** List of Taqman probes used for the study.

| Taqman probes              | Assay ID      |
|----------------------------|---------------|
| ANGPT1                     | Hs00919202_m1 |
| LURAP1L                    | Hs00402875_m1 |
| SGK1                       | Hs00178612_m1 |
| EFR3A                      | Hs00921352_m1 |
| 18s<br>(Housekeeping Gene) | Hs03003631_g1 |
